# Supplementary material
Source: PubMed Central journal article supplement (PMC1052002)
Supplement: JCI0523618sd.pdf [file JCI0523618sd.pdf]

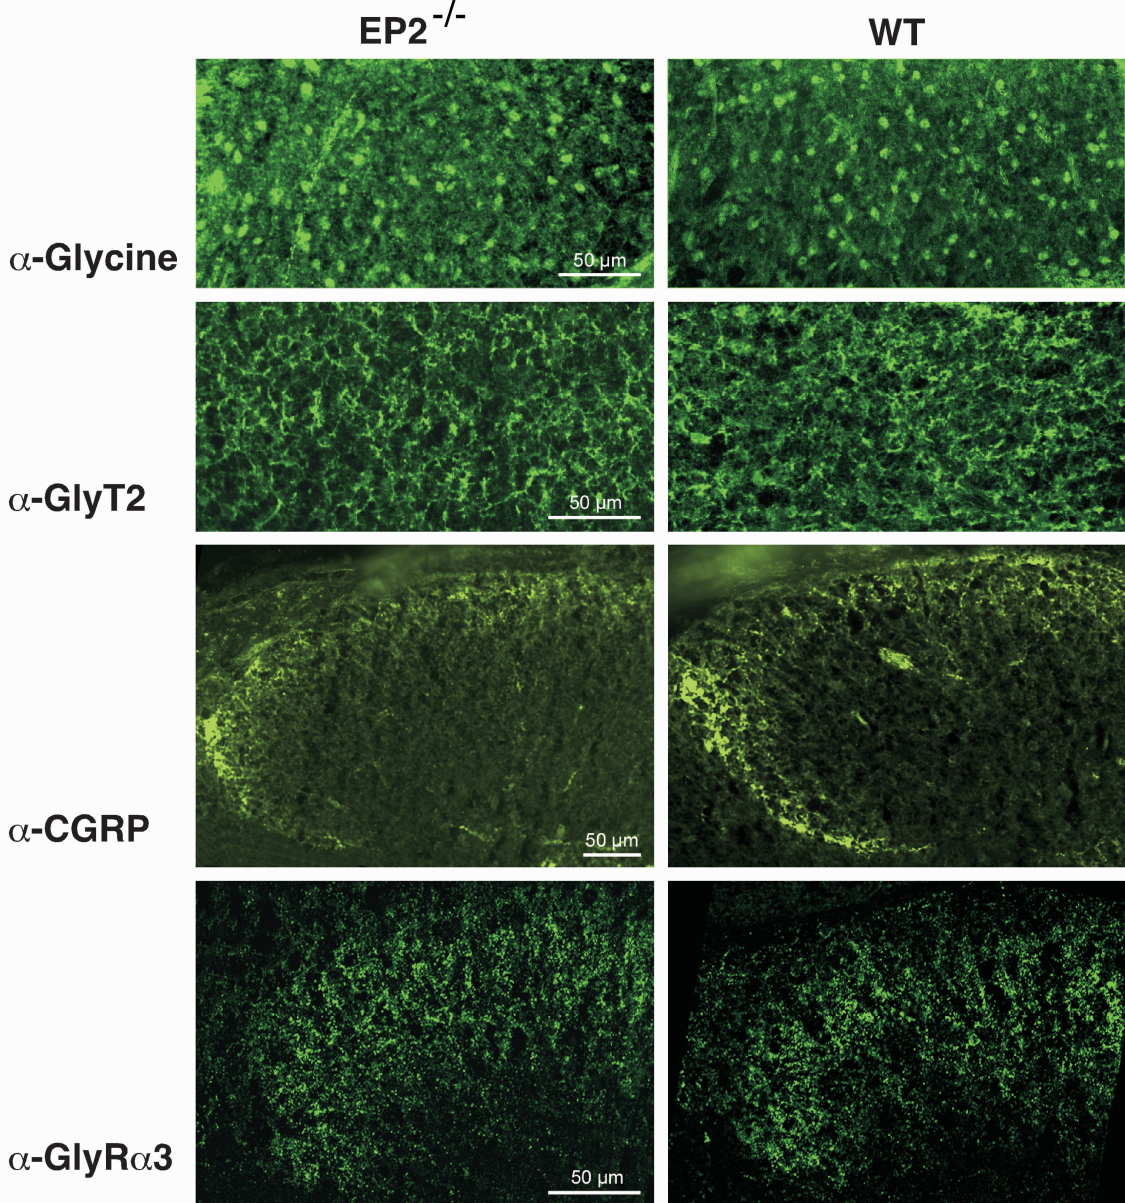

### Supplemental Figure

Characterization of the spinal cord dorsal horn of EP2<sup>-/-</sup> mice. Transverse sections through the thoracic spinal cord of age matched EP2<sup>-/-</sup> mice and wild-type mice were stained with antibodies directed against glycine, glycine transporter 2 (GlyT2), calcitonin gene-related peptide (CGRP) and the glycine receptor  $\alpha$ 3 (GlyR $\alpha$ 3) subunit. Note the absence of structural abnormalities in EP2<sup>-/-</sup> mice.
